# Supplementary material for: The RTR Complex Partner RMI2 and the DNA Helicase RTEL1 Are Both Independently Involved in Preserving the Stability of 45S rDNA Repeats in Arabidopsis thaliana
Source: PubMed Central journal article supplement (PMC5070779; doi:10.1371/journal.pgen.1006394), 2016-10-19
Supplement: pgen.1006394.s005.pdf [file pgen.1006394.s005.pdf]

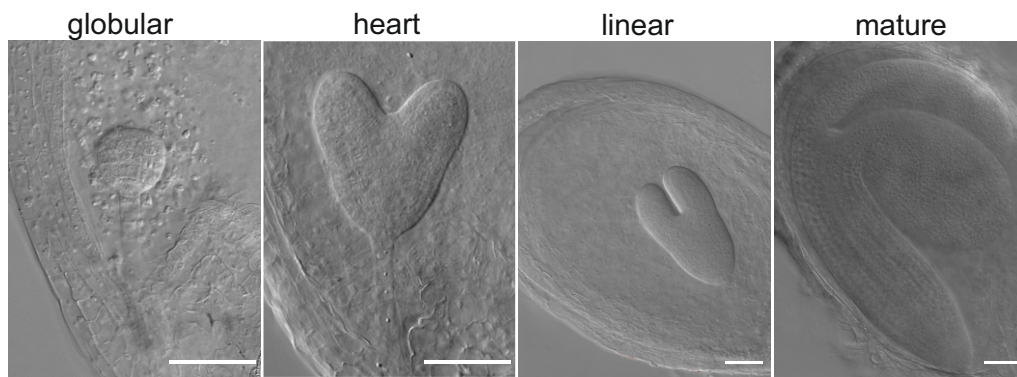

WT

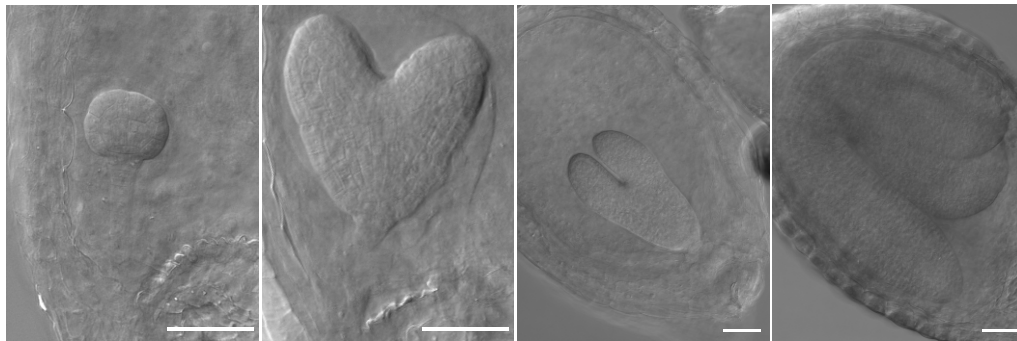

*rmi2-2 rtel1-1*
