# Supplementary material for: The RTR Complex Partner RMI2 and the DNA Helicase RTEL1 Are Both Independently Involved in Preserving the Stability of 45S rDNA Repeats in Arabidopsis thaliana
Source: PubMed Central journal article supplement (PMC5070779; doi:10.1371/journal.pgen.1006394), 2016-10-19
Supplement: pgen.1006394.s006.pdf [file pgen.1006394.s006.pdf]

**S1 Table. Oligonucleotides used in this study.**

| Target                | Name         | 5' – 3' sequence         | Analysis                                              |                            |
|-----------------------|--------------|--------------------------|-------------------------------------------------------|----------------------------|
| <b>Ubiquitin 10</b>   | UBQC-FW1     | AACGGGAAAGACGATTAC       | Analysis of 45S rDNA repeats                          |                            |
|                       | UBQC-RV1     | ACAAGATGAAGGGTGGAC       |                                                       |                            |
| <b>18S rDNA</b>       | 18S-FW1      | CTAGAGCTAATACGTGCAACAAAC |                                                       |                            |
|                       | 18S-RV1      | GAATCGAACCCCTAATTCTCCG   |                                                       |                            |
| <b>5.8S rDNA</b>      | 5.8S-FW1     | CGGAGTGTGGGCGGATG        |                                                       |                            |
|                       | 5.8S-RV1     | GTGAGGGACGACGATTTG       |                                                       |                            |
| <b>25S rDNA</b>       | 25S-FW1      | GTGCGAGTCAACGGGTG        |                                                       |                            |
|                       | 25S-RV1      | ACCCAAGTCAGACGAACG       |                                                       |                            |
| <b>RMI2</b>           | RMI2-FW1     | CTAAACCGACGCCTTCTC       |                                                       | Genotyping <i>Atrmi2-2</i> |
|                       | RMI2-RV1     | GTGAGAATGTTAGATGTTAT GA  |                                                       | Genotyping <i>Atrmi2-1</i> |
|                       | RMI2-FW2     | CGTGTGCGAGAGATTCTTAGG    |                                                       |                            |
|                       | RMI2-RV2     | CCCTAGGCGGTGTACTTTTTC    |                                                       |                            |
|                       | GABI-LB      | TTGGACGTGAATGTAGACAC     |                                                       |                            |
| <b>5' TDNA</b>        | 5' TDNA-FW1  | TTAGCGGCGGTGAAGATGC      | Expression analysis<br><i>RMI2</i> in <i>Atrmi2-1</i> |                            |
|                       | 5' TDNA-RV1  | CGGTCTTTTGGAGCTCGGT      |                                                       |                            |
| <b>T-DNA spanning</b> | T-DNA-FW1    | CTCCGTCAATGGAAATCAGG     |                                                       |                            |
|                       | T-DNA-RV1    | CTTCTATGAGCCCTTGATCC     |                                                       |                            |
| <b>3' T-DNA</b>       | 3' T-DNA-FW1 | TGTGGTATTTAGAAGTCATG GA  |                                                       |                            |
|                       | 3' T-DNA-RV1 | TCTACGGAATCAAAAGCAAG G   |                                                       |                            |
