# Supplementary material for: The RTR Complex Partner RMI2 and the DNA Helicase RTEL1 Are Both Independently Involved in Preserving the Stability of 45S rDNA Repeats in Arabidopsis thaliana
Source: PubMed Central journal article supplement (PMC5070779; doi:10.1371/journal.pgen.1006394), 2016-10-19
Supplement: pgen.1006394.s007.pdf [file pgen.1006394.s007.pdf]

**S2 Table. Amount of PMCs from one inflorescence.**

|                      | <b>Meiocytes</b> |                              |
|----------------------|------------------|------------------------------|
| <b>Inflorescence</b> | <b>Col-0</b>     | <b><i>rmi2-2 rtel1-1</i></b> |
| 1                    | 192              | 3                            |
| 2                    | 33               | 1                            |
| 3                    | 104              | 3                            |
| 4                    | 86               | 5                            |
|                      | <b>Relation</b>  |                              |
|                      | <b>Col-0</b>     | <b><i>rmi2-2 rtel1-1</i></b> |
|                      | 64               | 1                            |
|                      | 33               | 1                            |
|                      | 35               | 1                            |
|                      | 17               | 1                            |
| Mean Value           | 37               | 1                            |
| p-value              |                  | 0.0340                       |
| t-test               |                  | *                            |
