# Supplementary material for: The RTR Complex Partner RMI2 and the DNA Helicase RTEL1 Are Both Independently Involved in Preserving the Stability of 45S rDNA Repeats in Arabidopsis thaliana
Source: PubMed Central journal article supplement (PMC5070779; doi:10.1371/journal.pgen.1006394), 2016-10-19
Supplement: pgen.1006394.s009.pdf [file pgen.1006394.s009.pdf]

## **S2 Method. Preparation of pollen mother cells from inflorescences.**

The preparation of PMC was performed as described in previous studies. After four weeks of cultivation in the greenhouse, primary inflorescences were harvested and preserved in fixative solution (ethanol : acetic acid, in proportion 3:1). After changing the pH of flower buds with 0.01 M citrate buffer to pH 4.5, a digestion solution was applied for 75 min at 37 °C. Three to four flower buds were transferred to a microscope slide, squashed and mixed with 7 µl of 60 % acetic acid. After heating each slide to 45 °C, fixative solution was added and microscope slide was dried. Chromatin spreads were stained with 10 µl of DAPI (4'6-Diamidin-2-phenylindol) and analysed by fluorescence microscopy.
