# Supplementary material for: The RTR Complex Partner RMI2 and the DNA Helicase RTEL1 Are Both Independently Involved in Preserving the Stability of 45S rDNA Repeats in Arabidopsis thaliana
Source: PLoS Genet. 2016 Oct 19;12(10):e1006394. doi: 10.1371/journal.pgen.1006394 (PMC5070779; doi:10.1371/journal.pgen.1006394)
Supplement: S1 Fig — (A) Gene structure of the AtRMI2 gene with three exons and two introns and a length of 884 bp. (B) The Atrmi2-1 mutant carries a multi-copy T-DNA insertion in intron II flanked on both sides by LB structures and bordered by a 2 bp duplication of chromosomal sequence. (C) The Cas9-mediated mutant Atrmi2-2 carries a 297 bp insertion in exon I, harbouring a stop codon (red box) in frame, which was validated by cDNA analysis. (PDF) [file pgen.1006394.s001.pdf]

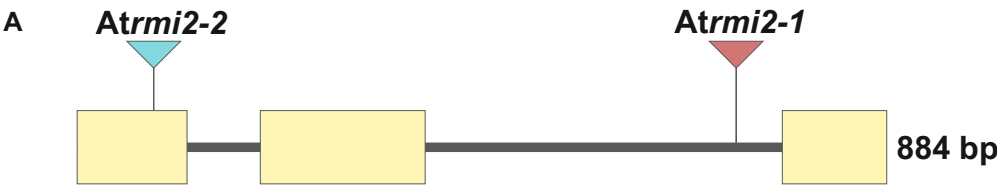

**B**

*Atrmi2-1* 5' ...gcatttacatg **LB - LB** caatgctttg... 3'

tg

**C**

|                 |                         |               |                         |
|-----------------|-------------------------|---------------|-------------------------|
| <i>AtRMI2</i>   | ...CCTTCTCAGAACGCCGCCTC | <b>297 bp</b> | CCTAGGCGGTGTACTTTTTC... |
| 5'              |                         |               | 3'                      |
| <i>Atrmi2-2</i> | ...CCTTCTCAGAACGCCGCCTC |               | CCTAGGCGGTGTACTTTTTC... |

TATGTTGAAAAAGATCGAAGCCGCGGTATCTTTTCACTCAAGATTGGGTCTCACTACCTGG  
 TGTTCCTGCCTGTGGCTTCAGGGGGTATTCACGTTTGGCATATGCCTGCCTTTGACCGAGATCT  
 TTGGAGATGATTCTGTACTACAATTTCGGTGGAGGAACTTTAGGCCACCTTTGGGGAAATGCA  
 CCGGGTGCCGTAGCCAACCGAGTAGCTCTGGAAGCATGTGTACAAGCTCGTAATGAGGGACG  
 TGATCTTGACAGTCGAGGGTAATGAAATTATCCGTGAAGCTTGCAAATGG
